# Supplementary material
Source: Springer Nature journal article supplement (https://www.springermedizin.de/resource/supplementary/12961_2013_297_MOESM1_ESM.pdf/9570996)

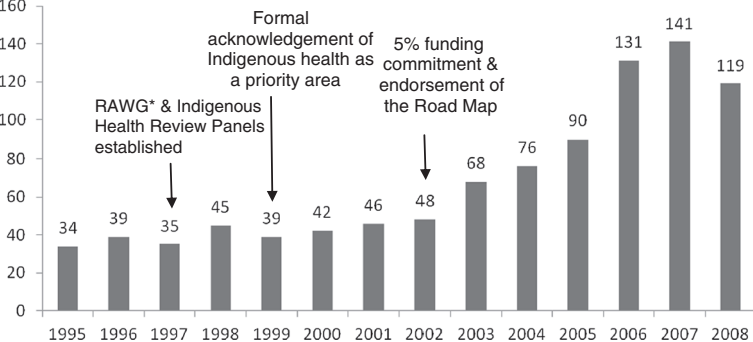

\*Aboriginal and Torres Strait Islander Research Agenda Working Group.

Supplement: MOESM1 [file 9570996]
